# Supplementary material for: Serum MicroRNA Profiles Serve as Novel Biomarkers for the Diagnosis of Alzheimer’s Disease
Source: Hindawi journal article supplement (doi:10.1155/2015/625659), 2015-01-01
Supplement: f1 [file 625659.f1.pdf]

**Table S1** Distribution of small RNAs in pooled serum from non-dementia controls and AD patients by Solexa sequencing analysis.

|                  | NDC<br>(60 ml) | AD<br>(60 ml) |
|------------------|----------------|---------------|
| Total            |                |               |
| (match genome)   | 646838         | 425618        |
| rRNA etc         | 26.21%         | 19.82%        |
| miRNA            | 68.99%         | 76.15%        |
| repeat           | 2.19%          | 1.71%         |
| exon-sense       | 0.82%          | 0.84%         |
| exon-antisense   | 0.05%          | 0.06%         |
| intron-sense     | 0.53%          | 0.50%         |
| intron-antisense | 0.39%          | 0.22%         |
| unannotated      | 0.81%          | 0.70%         |

**Table S2** The number of miRNAs in pooled serum from non-dementia controls and AD patients by Solexa sequencing analysis.

| Sample | Number of miRNA | Number of miRNA* | Number of hairpin | Number of hairpin-matched reads (unique) | Number of hairpin-matched reads (total) |
|--------|-----------------|------------------|-------------------|------------------------------------------|-----------------------------------------|
| NDC    | 239             | 60               | 274               | 1,504                                    | 446,261                                 |
| AD     | 204             | 39               | 242               | 1,059                                    | 324,096                                 |

**Table S3** Differentially-expressed miRNAs in AD serum samples compared to non-dementia controls determined by Solexa sequencing.

| miRNA           | Copy number in NDC | Copy number in AD | AD/NDC |
|-----------------|--------------------|-------------------|--------|
| hsa-let-7a      | 11081              | 5189              | 0.47   |
| hsa-let-7d      | 2614               | 845               | 0.32   |
| hsa-let-7e      | 262                | 112               | 0.43   |
| hsa-let-7f      | 1910               | 746               | 0.39   |
| hsa-let-7g      | 526                | 252               | 0.48   |
| hsa-let-7i      | 367                | 132               | 0.36   |
| hsa-miR-26a     | 210                | 97                | 0.46   |
| hsa-miR-27a     | 225                | 64                | 0.29   |
| hsa-miR-29a     | 121                | 390               | 3.22   |
| hsa-miR-31      | 4                  | 61                | 15.25  |
| hsa-miR-93      | 124                | 25                | 0.20   |
| hsa-miR-103     | 2190               | 476               | 0.22   |
| hsa-miR-107     | 1414               | 317               | 0.22   |
| hsa-miR-106b    | 2                  | 88                | 44.0   |
| hsa-miR-199a-3p | 734                | 246               | 0.33   |
| hsa-miR-148a    | 49                 | 7                 | 0.14   |
| hsa-miR-7       | 73                 | 5                 | 0.07   |
| hsa-miR-199b-3p | 734                | 246               | 0.33   |
| hsa-miR-221     | 2133               | 737               | 0.35   |
| hsa-miR-222     | 8788               | 3784              | 0.43   |
| hsa-miR-223     | 334                | 102               | 0.30   |
| hsa-miR-23b     | 78                 | 15                | 0.20   |
| hsa-miR-27b     | 180                | 68                | 0.38   |
| hsa-miR-122     | 48207              | 137395            | 2.85   |
| hsa-miR-143     | 54                 | 24                | 0.44   |
| hsa-miR-191     | 712                | 300               | 0.42   |
| hsa-miR-146a    | 275                | 103               | 0.38   |
| hsa-miR-193a-5p | 112                | 291               | 2.60   |
| hsa-miR-148b    | 52                 | 2                 | 0.03   |
| hsa-miR-324-3p  | 79                 | 36                | 0.45   |
| hsa-miR-339-3p  | 109                | 41                | 0.37   |
| hsa-miR-483-5p  | 205                | 502               | 2.45   |
| hsa-miR-574-5p  | 33                 | 66                | 2.00   |
| hsa-miR-886-5p  | 429                | 191               | 0.45   |
| hsa-miR-874     | 28                 | 73                | 2.60   |
| hsa-miR-885-3p  | 8                  | 64                | 8.05   |
| hsa-miR-1308    | 48                 | 352               | 7.34   |
| hsa-miR-1307    | 1446               | 515               | 0.36   |

**Table S4** MiRNAs showing no significantly alteration in AD serum samples compared to control samples in training set by RT-qPCR.<sup>a</sup>

| miRNA       | NC<br>(n=48) | AD<br>(n=48) | Fold<br>change | <i>p</i> -value <sup>b</sup> |
|-------------|--------------|--------------|----------------|------------------------------|
| miR-122     | 16.52±3.20   | 15.56±2.06   | 0.94           | 0.7993                       |
| miR-23a     | 0.97±0.15    | 0.66±0.08    | 0.69           | 0.0677                       |
| miR-103     | 2.66±0.46    | 4.04±0.74    | 1.52           | 0.1118                       |
| miR-193a-5p | 3.62±1.09    | 2.00±0.32    | 0.55           | 0.1504                       |
| miR-874     | 0.65±0.11    | 0.54±0.07    | 0.84           | 0.4100                       |
| miR-23b     | 1.06±0.29    | 1.27±0.18    | 1.19           | 0.5471                       |
| miR-221     | 1.08±0.20    | 1.11±0.16    | 1.03           | 0.9167                       |
| miR-199a-3p | 0.16±0.02    | 0.18±0.03    | 1.18           | 0.4820                       |
| miR-7       | 1.32±0.26    | 0.80±0.12    | 0.60           | 0.0652                       |
| miR-148a    | 1.33±0.21    | 0.78±0.13    | 0.59           | 0.0257                       |
| miR-191     | 12.29±1.52   | 6.78±0.88    | 0.55           | 0.0020                       |
| miR-885-3p  | 10.42±1.28   | 9.69±1.41    | 0.93           | 0.6979                       |

<sup>a</sup>The absolute concentrations of miRNAs are presented as mean ± SEM (fmol/L).

<sup>b</sup> Mann-Whitney unpaired test for rank sum.
